# Supplementary material
Source: publisher site journal article supplement (https://www.spandidos-publications.com/2282/downloadSupplementary)
Supplement: Supplementary file 1 [file downloadSupplementary]

## Sheet: upregulated pathway
Table SVIII. Pathways controlled by over- and underexpressed microRNAs from the mesenchymal stem cell treatment group.
Path name	(-LgP)
Proteoglycans in cancer	16.9176
Endocytosis	16.0115
Pathways in cancer	14.2296
Neurotrophin signaling pathway	13.8124
HTLV-I infection	13.6507
MAPK signaling pathway	13.3449
Axon guidance	12.8483
PI3K-Akt signaling pathway	11.9937
Glioma	11.5457
Regulation of actin cytoskeleton	11.3521
Transcriptional misregulation in cancer	11.0792
ErbB signaling pathway	10.0904
Hepatitis B	9.11066
Calcium signaling pathway	8.66892
Chronic myeloid leukemia	8.61079
Hepatitis C	8.45636
Focal adhesion	8.25616
Prostate cancer	8.16062
GnRH signaling pathway	7.92894
HIF-1 signaling pathway	7.77667
Pancreatic cancer	7.34452
Bladder cancer	7.29024
Dopaminergic synapse	7.03696
Fc gamma R-mediated phagocytosis	6.93466
Melanoma	6.91414
Estrogen signaling pathway	6.54263
Non-small cell lung cancer	6.53751
Bacterial invasion of epithelial cells	6.44609
Wnt signaling pathway	6.41289
Phosphatidylinositol signaling system	6.15929
Influenza A	6.13676
Adipocytokine signaling pathway	6.02499
Cell cycle	5.94223
Circadian entrainment	5.93711
Cholinergic synapse	5.78965
Gastric acid secretion	5.73629
Osteoclast differentiation	5.41025
Long-term potentiation	5.17493
Oocyte meiosis	5.11791
mTOR signaling pathway	5.1053
Progesterone-mediated oocyte maturation	5.03504
Melanogenesis	4.95848
Endometrial cancer	4.83669
GABAergic synapse	4.8084
Measles	4.78867
Tuberculosis	4.72376
Ubiquitin mediated proteolysis	4.62198
T cell receptor signaling pathway	4.61003
Insulin signaling pathway	4.54111
Acute myeloid leukemia	4.46118
Amphetamine addiction	4.42709
Cytokine-cytokine receptor interaction	4.36817
Small cell lung cancer	4.28201
Insulin secretion	4.22981
Shigellosis	4.18982
Glutamatergic synapse	4.16167
Retrograde endocannabinoid signaling	4.15489
Protein processing in endoplasmic reticulum	4.1496
Colorectal cancer	4.12553
Salivary secretion	4.07786
Aldosterone-regulated sodium reabsorption	4.07692
Mineral absorption	4.03333
Lysosome	3.99656
Toxoplasmosis	3.99656
Viral carcinogenesis	3.99277
Chemokine signaling pathway	3.90612
Fc epsilon RI signaling pathway	3.6552
Apoptosis	3.47613
Inositol phosphate metabolism	3.39711
Pertussis	3.39545
Endocrine and other factor-regulated calcium reabsorption	3.33019
mRNA surveillance pathway	3.29951
Morphine addiction	3.25697
TGF-beta signaling pathway	3.11241
VEGF signaling pathway	3.07679
Amyotrophic lateral sclerosis (ALS)	3.02612
Alzheimer's disease	2.96883
Circadian rhythm	2.89007
Vascular smooth muscle contraction	2.85875
Jak-STAT signaling pathway	2.78887
Vasopressin-regulated water reabsorption	2.77101
Glycerophospholipid metabolism	2.69829
Dilated cardiomyopathy	2.69829
Toll-like receptor signaling pathway	2.68575
Notch signaling pathway	2.59561
Type II diabetes mellitus	2.59561
Pancreatic secretion	2.51389
Cocaine addiction	2.48633
Renal cell carcinoma	2.42528
p53 signaling pathway	2.33915
Epithelial cell signaling in Helicobacter pylori infection	2.33915
Neuroactive ligand-receptor interaction	2.33263
Chagas disease (American trypanosomiasis)	2.21365
Salmonella infection	2.20029
RNA degradation	2.17668
Bile secretion	2.17668
Gap junction	2.16581
Epstein-Barr virus infection	2.15214
Adherens junction	2.13796
Arrhythmogenic right ventricular cardiomyopathy (ARVC)	2.06266
Herpes simplex infection	2.05686
B cell receptor signaling pathway	2.02603
Leukocyte transendothelial migration	1.83976
Alcoholism	1.79341
Prion diseases	1.72556
Hypertrophic cardiomyopathy (HCM)	1.72396
Dorso-ventral axis formation	1.63215
Basal cell carcinoma	1.56654
Nicotine addiction	1.52751
NOD-like receptor signaling pathway	1.49146
Olfactory transduction	1.45017
Ether lipid metabolism	1.43785
Hippo signaling pathway	1.4324
Cardiac muscle contraction	1.41494
Thyroid cancer	1.33558
Purine metabolism	1.31758
Carbohydrate digestion and absorption	1.31335

## Sheet: downregulated pathway
Path name	(-LgP)
Proteoglycans in cancer	21.7085
Pathways in cancer	21.3532
Neurotrophin signaling pathway	15.7429
MAPK signaling pathway	15.2608
PI3K-Akt signaling pathway	15.1728
Axon guidance	13.7141
Wnt signaling pathway	13.5123
Regulation of actin cytoskeleton	12.2339
Focal adhesion	12.0654
ErbB signaling pathway	11.5734
Hippo signaling pathway	10.8637
Endocytosis	10.7497
Hepatitis B	10.6524
Calcium signaling pathway	10.5831
Melanogenesis	10.2812
GnRH signaling pathway	10.2313
HTLV-I infection	10.0563
Insulin signaling pathway	9.66178
Transcriptional misregulation in cancer	9.33332
Morphine addiction	9.24831
Chagas disease (American trypanosomiasis)	9.08031
Circadian entrainment	8.90066
Glutamatergic synapse	8.88827
Long-term potentiation	8.64357
Glioma	8.32946
Glycerophospholipid metabolism	7.71398
Cholinergic synapse	7.679
Aldosterone-regulated sodium reabsorption	7.45299
HIF-1 signaling pathway	7.39299
Gastric acid secretion	7.35914
Progesterone-mediated oocyte maturation	7.28464
Dilated cardiomyopathy	6.89935
TGF-beta signaling pathway	6.85478
Adipocytokine signaling pathway	6.84179
Melanoma	6.84179
Colorectal cancer	6.77726
Thyroid cancer	6.74396
Adherens junction	6.67031
Dopaminergic synapse	6.55486
Basal cell carcinoma	6.54734
Hypertrophic cardiomyopathy (HCM)	6.54508
Metabolic pathways	6.33873
Estrogen signaling pathway	6.27203
Prostate cancer	6.25408
p53 signaling pathway	6.23934
Chemokine signaling pathway	6.14137
Retrograde endocannabinoid signaling	6.07948
Fc epsilon RI signaling pathway	6.07367
mTOR signaling pathway	6.06985
Endometrial cancer	5.92219
T cell receptor signaling pathway	5.77481
Hepatitis C	5.76878
SNARE interactions in vesicular transport	5.74225
Insulin secretion	5.62142
Pancreatic cancer	5.56113
Protein digestion and absorption	5.55516
Lysine degradation	5.30023
Amphetamine addiction	5.2545
Chronic myeloid leukemia	5.0393
Arrhythmogenic right ventricular cardiomyopathy (ARVC)	4.90223
Ubiquitin mediated proteolysis	4.88689
ECM-receptor interaction	4.8789
Oocyte meiosis	4.86599
Glycerolipid metabolism	4.7743
Purine metabolism	4.60507
mRNA surveillance pathway	4.58567
Epstein-Barr virus infection	4.5642
Vascular smooth muscle contraction	4.47171
Amoebiasis	4.36222
Cell cycle	4.2881
Herpes simplex infection	4.0673
Gap junction	4.06285
Non-small cell lung cancer	4.02908
GABAergic synapse	4.0098
Cell adhesion molecules (CAMs)	3.9608
VEGF signaling pathway	3.918
Fc gamma R-mediated phagocytosis	3.80543
Notch signaling pathway	3.66691
Bladder cancer	3.62968
Long-term depression	3.61723
Small cell lung cancer	3.55077
Serotonergic synapse	3.51577
Pertussis	3.453
B cell receptor signaling pathway	3.3996
Salivary secretion	3.35593
Alcoholism	3.31623
Tight junction	3.3022
Measles	3.3022
Amyotrophic lateral sclerosis (ALS)	3.25133
Lysosome	3.19649
Phosphatidylinositol signaling system	3.14629
Acute myeloid leukemia	3.06573
Type II diabetes mellitus	2.88323
Influenza A	2.86682
Endocrine and other factor-regulated calcium reabsorption	2.81987
Cytokine-cytokine receptor interaction	2.76817
Protein processing in endoplasmic reticulum	2.74018
Osteoclast differentiation	2.73811
Ovarian steroidogenesis	2.69814
Renal cell carcinoma	2.57927
Pancreatic secretion	2.50102
Circadian rhythm	2.49247
ABC transporters	2.38751
PPAR signaling pathway	2.34643
RNA degradation	2.30258
Glycosaminoglycan biosynthesis - heparan sulfate / heparin	2.20455
Glycosaminoglycan biosynthesis - keratan sulfate	2.14878
Toxoplasmosis	2.14444
Bacterial invasion of epithelial cells	2.09548
Jak-STAT signaling pathway	2.07224
Cocaine addiction	2.05411
Hedgehog signaling pathway	2.00373
Epithelial cell signaling in Helicobacter pylori infection	1.8709
Neuroactive ligand-receptor interaction	1.86305
Huntington's disease	1.76963
Apoptosis	1.70098
Mucin type O-Glycan biosynthesis	1.6948
Toll-like receptor signaling pathway	1.59173
African trypanosomiasis	1.51982
Mineral absorption	1.37323
Dorso-ventral axis formation	1.3713
Leukocyte transendothelial migration	1.33184
Alzheimer's disease	1.32337
